# Supplementary material for: The Role of Zn Ions in the Structural, Surface, and Gas-Sensing Properties of SnO2:Zn Nanocrystals Synthesized via a Microwave-Assisted Route
Source: MDPI journal article supplement (doi:10.3390/s24010140), 2023-12-26
Supplement: s1 [file s1]

## Supplementary Material

### The Role of Zn Ions in the Structural, Surface, and Gas-Sensing Properties of SnO<sub>2</sub>:Zn Nanocrystals Synthesized via a Microwave-Assisted Route

**Luís F. da Silva**<sup>1,2,\*</sup>, **Mattia A. Lucchini**<sup>1</sup>, **Ariadne C. Catto**<sup>3</sup>, **Waldir Avansi, Jr.**<sup>2</sup>, **Sandrine Bernardini**<sup>4</sup>, **Khalifa Aguir**<sup>4</sup>, **Markus Niederberger**<sup>1</sup> and **Elson Longo**<sup>3</sup>

<sup>1</sup> Laboratory for Multifunctional Materials, Department of Materials, ETH Zürich, 8093 Zürich, Switzerland; mattia.a.lucchini@gmail.com (M.L.); markus.niederberger@mat.ethz.ch (M.N.)

<sup>2</sup> Laboratory of Nanostructured Multifunctional Materials, Federal University of São Carlos, São Carlos 13565-905, Brazil; w\_avansi@yahoo.com.br

<sup>3</sup> Center for the Development of Functional Materials, Federal University of São Carlos, São Carlos 13565-905, Brazil; ade.catto@gmail.com (A.C.C.); elson.liec@gmail.com (E.L.)

<sup>4</sup> Aix Marseille University, CNRS, IM2NP, Marseille, France; sandrine.bernardini@im2np.fr (S.B.); khalifa.aguir@im2np.fr (K.A.)

\* Correspondence: lfsilva83@gmail.com

#### *S1. Preparation of sensing devices*

The sensing devices were fabricated via doctor blading of the NPs onto a Si/SiO<sub>2</sub> substrate containing 100 nm thick Pt electrodes separated by a distance of 50 µm. The procedure for the slurry preparation was adapted from the literature.<sup>[1]</sup> First, 100 mg of the as-obtained SnO<sub>2</sub>:Zn powders were mixed in a solution with 100 µL of propanedyl, 900 µL of hexyl alcohol, and 90 µL of acetylacetone. The mixture was sonicated and 500 mg of Pluronic was added, and then it was stirred during 12 hours. The Zn-doped SnO<sub>2</sub> thick films were prepared by the doctor blade method by depositing 1 layer of the obtained slurry onto Si/SiO<sub>2</sub> substrates containing Pt electrodes. The speed of the blade was set to 15 mm s<sup>-1</sup> and its height was set to +75 µm towards the sensing platform. The as-prepared films were annealed in an electric oven under an air atmosphere to eliminate the residual organics coming from the slurry. Fig. S1 shows photograph of two representative samples (SnO<sub>2</sub> and SnZn2) deposited onto the sensing platforms.

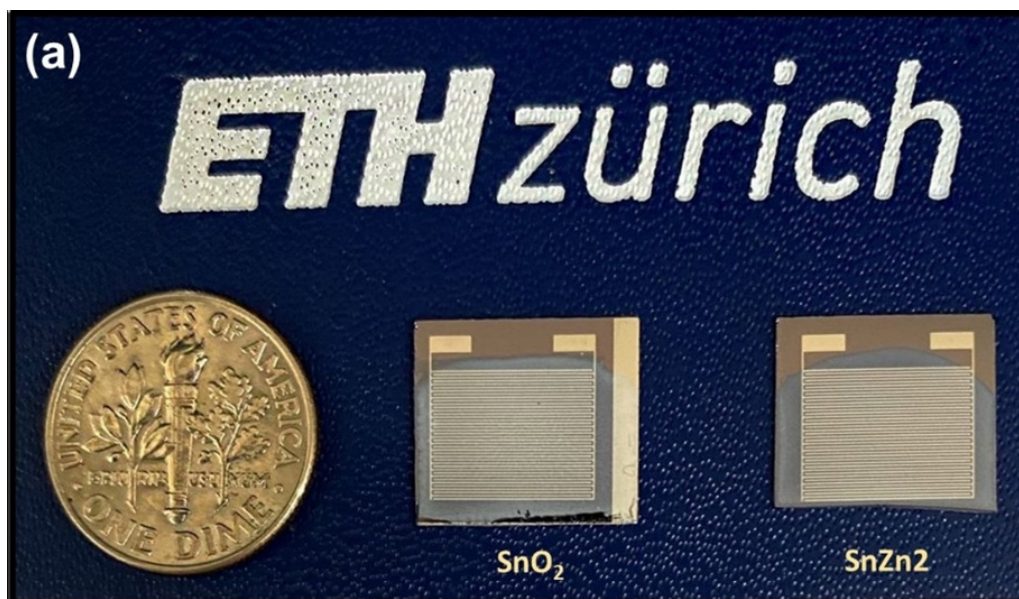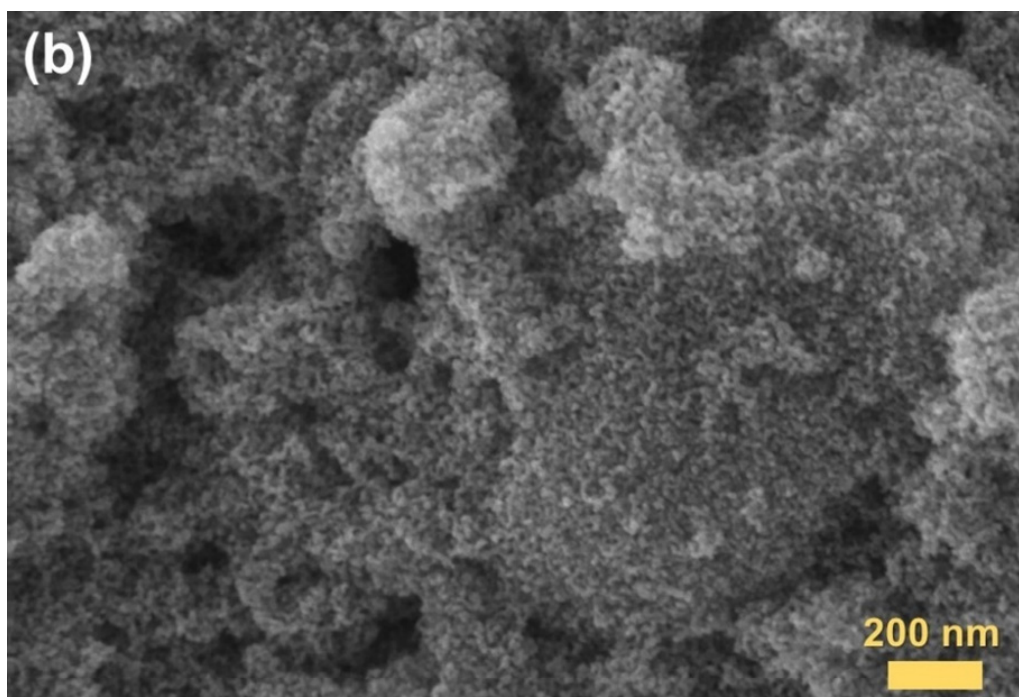

**Figure S1.** (a) Photograph of sensing platforms based on  $\text{SnO}_2$  and  $\text{SnZn}_2$  samples compared to a U.S. one tenth-dollar coin. (b) FESEM image of the  $\text{SnZn}_2$  sample onto sensing platform.

## S2. XPS analysis

Figure S2 shows the XPS survey spectra of the pristine  $\text{SnO}_2$ ,  $\text{SnZn1}$ , and  $\text{SnZn2}$  samples synthesized via microwave-assisted method.

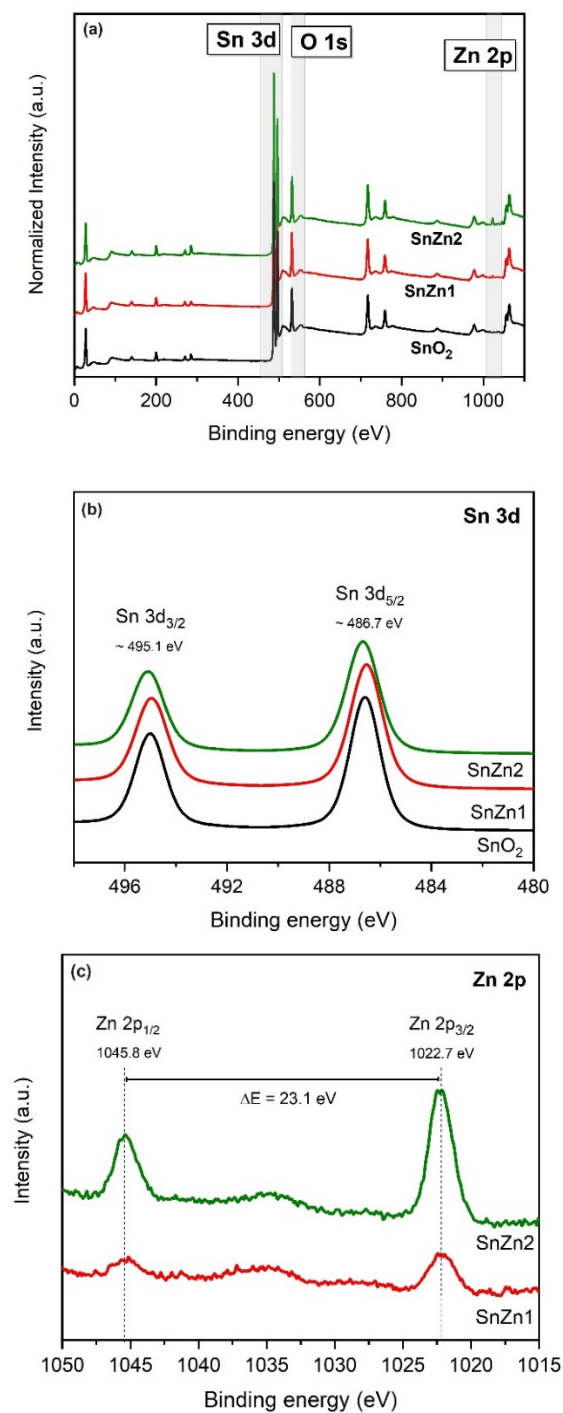

**Figure S2.** XPS spectra of the Zn-doped  $\text{SnO}_2$  NPs synthesized via microwave-assisted route. (a) Survey scan, (b) Sn 3d and, (c) Zn 2p.

### S3. Gas-sensing tests

Figure S3 shows the sensing performance of SnZn2 nanocrystals exposed to NO<sub>2</sub> levels (0.2 to 1.0 ppm) at an operating temperature of 150°C and under different humidity levels (0 %RH, 20 %RH, and 40 %RH). The y-axis (sensor response) range was the same to provide a good visualization of the sensing performance of the samples.

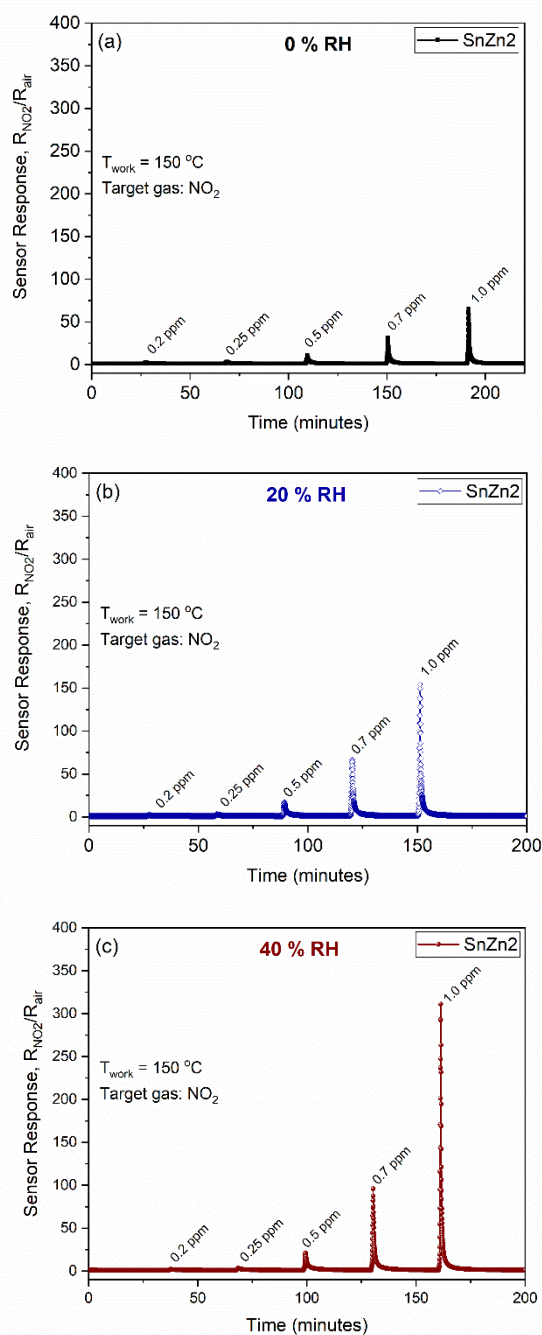

**Figure S3.** NO<sub>2</sub> gas-sensing performance of SnZn2 nanocrystals kept at 150 °C and exposed to different relative humidity levels. (a) 0 %RH, (b) 20 %RH, and (c) 40 %RH.

## Reference

- [1] Hilaire, S.; Suess, M.J.; Kranzlin, N.; Bienkowski, K.; Solarzka, R.; Augustynski, J.; Niederberger, M. Microwave-assisted nonaqueous synthesis of WO<sub>3</sub> nanoparticles for crystallographically oriented photoanodes for water splitting. *J. Mater. Chem. A* **2014**, 2, 20530–20537.
